# Supplementary material
Source: publisher figshare collection journal article supplement (https://acs.figshare.com/ndownloader/files/25538033)
Supplement: Supplementary file 1 [file 25538033]

## **Supporting Information**

### **Deciphering Dissolved Organic Matter: Ionization, Dopant, and Fragmentation Insights via Fourier Transform-Ion Cyclotron Resonance Mass Spectrometry**

Martin R. Kurek<sup>1\*</sup>, Brett A. Poulin<sup>2,3</sup>, Amy M. McKenna<sup>4</sup>, and Robert G.M. Spencer<sup>1</sup>

1. National High Magnetic Field Laboratory Geochemistry Group and Department of Earth, Ocean, and Atmospheric Science, Florida State University, Tallahassee, FL, 32306, USA.
2. U.S. Geological Survey, Water Mission Area, Boulder, Colorado, USA.
3. (Current Address) Department of Environmental Toxicology, University of California Davis, Davis, CA, 95616, USA
4. National High Magnetic Field Laboratory Ion Cyclotron Resonance Facility, Tallahassee, FL, USA.

\*Corresponding author: Martin Kurek (mrk19f@my.fsu.edu)

Contains 6 tables, 5 figures, and 12 pages.

#### **Supplemental Tables:**

S2- Table S1

S3- Table S2

S4- Table S3

S5- Table S4

S6- Table S5

S7- Table S6

#### **Supplemental Figures:**

S8- Figure S1

S9- Figure S2

S10- Figure S3

S11- Figure S4

S12- Figure S5

**Table S1.** Molecular properties of assigned formulae for the Suwannee River DOM in toluene- and THF-doped APPI positive. Rows denote properties of formulae present in THF-doped APPI and toluene-doped APPI spectra, formulae common to both toluene- and THF-doped APPI spectra, formulae unique to THF-doped APPI spectra, formulae unique to toluene-doped APPI spectra, and formulae common between toluene- and THF-doped APPI as well as ESI negative spectra. H/C, O/C, Mass,  $AI_{mod}$ , DBE/C, formulaic N/C, and formulaic S/C are all computed means. % CHO, % CHON, % CHOS, and % CHONS values present the percentage of total formulae based on number averages, with intensity-weighted averages (relative abundance) presented in parentheses.

|                                              | Assigned<br>Formulae | H/C  | O/C  | Mass (Da) | $AI_{mod}$ | DBE/C | Formulaic<br>N/C<br>(x 1000) | Formulaic<br>S/C<br>(x 1000) | % CHO          | % CHON         | % CHOS       | % CHONS      |
|----------------------------------------------|----------------------|------|------|-----------|------------|-------|------------------------------|------------------------------|----------------|----------------|--------------|--------------|
| THF                                          | 7843                 | 1.19 | 0.38 | 399.8608  | 0.31       | 0.49  | 48.9                         | 6.6                          | 46.8<br>(78.4) | 44.1<br>(20.3) | 5.0<br>(0.8) | 4.1<br>(0.5) |
| Toluene                                      | 6687                 | 1.14 | 0.39 | 350.9529  | 0.36       | 0.52  | 40.0                         | 7.1                          | 53.6<br>(85.2) | 37.0<br>(13.4) | 6.4<br>(1.0) | 3.1<br>(0.4) |
| Common to<br>THF and<br>toluene              | 4593                 | 1.16 | 0.40 | 354.7004  | 0.33       | 0.50  | 44.4                         | 6.6                          | 51.0           | 40.7           | 5.3          | 3.0          |
| Unique to<br>THF                             | 3250                 | 1.22 | 0.37 | 463.6828  | 0.28       | 0.47  | 55.2                         | 6.5                          | 40.9           | 49.0           | 4.4          | 5.7          |
| Unique to<br>toluene                         | 2094                 | 1.09 | 0.37 | 342.7331  | 0.42       | 0.56  | 30.5                         | 8.3                          | 59.3           | 28.8           | 8.7          | 3.2          |
| Common to<br>THF,<br>toluene,<br>and ESI neg | 3101                 | 1.08 | 0.44 | 382.7587  | 0.37       | 0.53  | 26.9                         | 5.1                          | 59.9           | 33.2           | 5.6          | 1.4          |

**Table S2.** Molecular properties of assigned formulae for the Kissimmee River DOM in toluene- and THF-doped APPI positive. Rows denote properties of formulae present in THF-doped APPI and toluene-doped APPI spectra, formulae common to both toluene- and THF-doped APPI spectra, formulae unique to THF-doped APPI spectra, formulae unique to toluene-doped APPI spectra, and formulae common between toluene- and THF-doped APPI as well as ESI negative spectra. H/C, O/C, Mass,  $AI_{mod}$ , DBE/C, formulaic N/C, and formulaic S/C are all computed means. % CHO, % CHON, % CHOS, and % CHONS values present the percentage of total formulae based on number averages, with intensity-weighted averages (relative abundance) presented in parentheses.

|                                              | Assigned<br>Formulae | H/C  | O/C  | Mass (Da) | $AI_{mod}$ | DBE/C | Formulaic<br>N/C<br>(x 1000) | Formulaic<br>S/C<br>(x 1000) | % CHO          | % CHON         | % CHOS       | % CHONS      |
|----------------------------------------------|----------------------|------|------|-----------|------------|-------|------------------------------|------------------------------|----------------|----------------|--------------|--------------|
| THF                                          | 8012                 | 1.19 | 0.38 | 373.3835  | 0.31       | 0.50  | 69.2                         | 9.1                          | 37.3<br>(60.5) | 51.7<br>(37.4) | 5.5<br>(1.0) | 5.5<br>(1.2) |
| Toluene                                      | 7625                 | 1.12 | 0.38 | 344.5269  | 0.37       | 0.54  | 51.0                         | 9.9                          | 46.1<br>(76.4) | 41.1<br>(20.8) | 8.7<br>(1.9) | 4.2<br>(0.9) |
| Common to<br>THF and<br>toluene              | 4858                 | 1.14 | 0.39 | 341.7572  | 0.34       | 0.52  | 59.0                         | 9.2                          | 43.7           | 45.4           | 6.1          | 4.8          |
| Unique to<br>THF                             | 3154                 | 1.25 | 0.36 | 422.0966  | 0.25       | 0.47  | 84.7                         | 8.9                          | 27.4           | 61.4           | 4.6          | 6.6          |
| Unique to<br>toluene                         | 2767                 | 1.09 | 0.37 | 349.3898  | 0.42       | 0.56  | 37.0                         | 11.1                         | 50.2           | 33.4           | 13.2         | 3.2          |
| Common to<br>THF,<br>toluene,<br>and ESI neg | 3201                 | 1.06 | 0.41 | 368.8398  | 0.40       | 0.55  | 33.2                         | 5.9                          | 54.7           | 37.3           | 6.4          | 1.6          |

**Table S3.** Molecular properties of assigned formulae for the Wakulla Springs DOM in toluene- and THF-doped APPI positive. Rows denote properties of formulae present in THF-doped APPI and toluene-doped APPI spectra, formulae common to both toluene- and THF-doped APPI spectra, formulae unique to THF-doped APPI spectra, formulae unique to toluene-doped APPI spectra, and formulae common between toluene- and THF-doped APPI as well as ESI negative spectra. H/C, O/C, Mass,  $AI_{mod}$ , DBE/C, formulaic N/C, and formulaic S/C are all computed means. % CHO, % CHON, % CHOS, and % CHONS values present the percentage of total formulae based on number averages, with intensity-weighted averages (relative abundance) presented in parentheses.

|                                              | Assigned<br>Formulae | H/C  | O/C  | Mass (Da) | $AI_{mod}$ | DBE/C | Formulaic<br>N/C<br>(x 1000) | Formulaic<br>S/C<br>(x 1000) | % CHO          | % CHON         | % CHOS       | % CHONS      |
|----------------------------------------------|----------------------|------|------|-----------|------------|-------|------------------------------|------------------------------|----------------|----------------|--------------|--------------|
| THF                                          | 5070                 | 1.31 | 0.33 | 346.6571  | 0.25       | 0.45  | 83.6                         | 6.0                          | 32.7<br>(35.7) | 59.3<br>(62.1) | 2.8<br>(0.7) | 5.2<br>(1.6) |
| Toluene                                      | 3641                 | 1.29 | 0.33 | 304.7302  | 0.29       | 0.47  | 77.9                         | 4.3                          | 41.5<br>(69.0) | 53.1<br>(29.9) | 2.3<br>(0.3) | 3.2<br>(0.8) |
| Common to<br>THF and<br>toluene              | 2554                 | 1.30 | 0.34 | 298.9546  | 0.27       | 0.47  | 87.5                         | 3.8                          | 37.9           | 57.6           | 1.1          | 3.5          |
| Unique to<br>THF                             | 2516                 | 1.31 | 0.33 | 395.0800  | 0.23       | 0.44  | 79.7                         | 8.3                          | 27.4           | 61.1           | 4.5          | 7.0          |
| Unique to<br>toluene                         | 1087                 | 1.25 | 0.31 | 318.3006  | 0.35       | 0.50  | 55.2                         | 5.5                          | 50.0           | 42.4           | 5.2          | 2.5          |
| Common to<br>THF,<br>toluene,<br>and ESI neg | 1173                 | 1.32 | 0.36 | 346.5263  | 0.25       | 0.41  | 34.8                         | 1.3                          | 58.0           | 40.1           | 0.9          | 1.0          |

**Table S4.** Relative compositions of molecular classes from the IRMPD parent ions isolated from the 392-408 Da mass window and fragments from the 141 to 391 Da mass window ionized in THF-doped APPI positive for the Suwannee River and Kissimmee River DOM. % CHO, % CHON, % CHOS, and % CHONS values present the percentage of total formulae based on number averages, with intensity-weighted averages (relative abundance) presented in parentheses.

|                             | % CHO          | % CHON         | % CHOS        | % CHONS      |
|-----------------------------|----------------|----------------|---------------|--------------|
| Suwannee River parent ions  | 37.6<br>(80.7) | 44.4<br>(16.8) | 12.0<br>(1.9) | 6.0<br>(0.6) |
| Kissimmee River parent ions | 36.1<br>(69.5) | 48.0<br>(27.2) | 9.0<br>(2.0)  | 6.8<br>(1.2) |
| Suwannee River fragments    | 48.2<br>(85.7) | 45.3<br>(13.6) | 5.4<br>(0.6)  | 1.2<br>(0.1) |
| Kissimmee River fragments   | 40.5<br>(78.1) | 47.2<br>(20.2) | 9.2<br>(1.3)  | 3.1<br>(0.4) |

**Table S5.** Molecular properties of assigned formulae from the organic isolates in ESI negative, THF-doped APPI positive, and from formulae common between both ESI negative and THF-doped APPI positive (common). H/C, O/C, Mass,  $AI_{mod}$ , DBE/C, formulaic N/C, and formulaic S/C are all computed means. % CHO, % CHON, % CHOS, and % CHONS values present the percentage of total formulae based on number averages, with intensity-weighted averages (relative abundance) presented in parentheses. Atomic N/C was calculated as ratios from the molar C and N compositions of the organic isolates (see methods).

|                       | Penobscot River |                |          | Suwannee River |                |          | Everglades     |                |          | Lake Fryxell   |                |          | Pacific Ocean  |                |          |
|-----------------------|-----------------|----------------|----------|----------------|----------------|----------|----------------|----------------|----------|----------------|----------------|----------|----------------|----------------|----------|
|                       | ESI neg         | APPI THF       | Common   | ESI neg        | APPI THF       | Common   | ESI neg        | APPI THF       | Common   | ESI neg        | APPI THF       | Common   | ESI neg        | APPI THF       | Common   |
| Assigned formulae     | 8876            | 6013           | 4170     | 7726           | 4484           | 3170     | 10025          | 6723           | 4956     | 9110           | 6453           | 5098     | 5650           | 4298           | 2703     |
| H/C                   | 1.00            | 1.17           | 1.08     | 0.97           | 1.21           | 1.10     | 1.02           | 1.17           | 1.09     | 1.22           | 1.29           | 1.25     | 1.26           | 1.28           | 1.27     |
| O/C                   | 0.44            | 0.38           | 0.40     | 0.44           | 0.39           | 0.41     | 0.44           | 0.39           | 0.40     | 0.44           | 0.40           | 0.41     | 0.45           | 0.37           | 0.40     |
| DBE/C                 | 0.56            | 0.49           | 0.53     | 0.57           | 0.47           | 0.51     | 0.55           | 0.50           | 0.53     | 0.47           | 0.43           | 0.45     | 0.42           | 0.43           | 0.42     |
| $AI_{mod}$            | 0.40            | 0.33           | 0.38     | 0.42           | 0.31           | 0.37     | 0.38           | 0.32           | 0.37     | 0.25           | 0.22           | 0.25     | 0.22           | 0.26           | 0.25     |
| Mass (Da)             | 481.7525        | 386.434        | 397.7703 | 481.6426       | 385.541        | 400.5448 | 459.0104       | 386.0038       | 389.7462 | 459.7179       | 426.6683       | 412.3246 | 556.0078       | 428.3332       | 441.0678 |
| Formulaic N/C (x1000) | 23.2            | 38.4           | 22.6     | 19.1           | 29.6           | 18.2     | 34.1           | 47.6           | 36.5     | 43.8           | 49.2           | 45.5     | 24.9           | 37.6           | 26.9     |
| Formulaic S/C (x1000) | 8.1             | 6.7            | 4.7      | 8.3            | 2.6            | 2.1      | 13.7           | 11.8           | 9.4      | 19.1           | 16.3           | 14.8     | 3.7            | 2.9            | 0.8      |
| %CHO                  | 52.9<br>(89.4)  | 55.0<br>(89.0) | 65.1     | 55.7<br>(91.4) | 63.1<br>(91.6) | 71.6     | 35.6<br>(75.1) | 40.0<br>(74.6) | 44.5     | 28.1<br>(62.8) | 30.2<br>(65.3) | 33.3     | 52.4<br>(86.3) | 50.4<br>(83.2) | 59.8     |
| %CHON                 | 31.9<br>(7.1)   | 35.7<br>(9.9)  | 28.2     | 28.6<br>(5.8)  | 33.0<br>(7.8)  | 25.2     | 39.4<br>(17.6) | 44.4<br>(22.3) | 41.3     | 42.1<br>(22.3) | 47.3<br>(27.8) | 44.8     | 39.5<br>(11.6) | 45.4<br>(16.2) | 38.8     |
| %CHOS                 | 13.5<br>(3.3)   | 6.8<br>(0.8)   | 6.6      | 14.7<br>(2.7)  | 3.4<br>(0.4)   | 3.2      | 18.8<br>(6.3)  | 10.3<br>(2.1)  | 10.5     | 21.6<br>(12.6) | 15.7<br>(5.2)  | 15.4     | 7.8<br>(2.0)   | 3.6<br>(0.1)   | 1.4      |
| %CHONS                | 1.7<br>(0.2)    | 2.5<br>(0.3)   | 0.1      | 1.0<br>(0.1)   | 0.5<br>(0.1)   | 0.0      | 6.1<br>(1.2)   | 5.3<br>(1.0)   | 3.7      | 8.2<br>(2.3)   | 6.7<br>(1.8)   | 6.5      | 0.4<br>(0.1)   | 0.6<br>(0.1)   | 0.0      |
| Atomic N/C (x1000)    |                 | 15.4           |          |                | 12.9           |          |                | 25.9           |          |                | 44.7           |          |                | 17.2           |          |

**Table S6.** Correlations and percent contributions of variables for principal components 1 and 2 from the PCA in figure 3. CHO, CHON, CHOS, and CHONS were computed as percent relative abundances.

|           | PCA1        |              | PCA2        |              |
|-----------|-------------|--------------|-------------|--------------|
|           | Correlation | Contribution | Correlation | Contribution |
| m/z       | -0.74       | 9.41         | 0.25        | 1.91         |
| H/C       | 0.78        | 10.31        | 0.03        | 0.03         |
| O/C       | -0.85       | 13.51        | 0.34        | 3.63         |
| N/C       | 0.92        | 14.29        | 0.21        | 1.44         |
| S/C       | -0.25       | 1.10         | 0.81        | 20.27        |
| CHO index | -0.93       | 14.51        | 0.14        | 0.61         |
| DBE       | -0.94       | 14.80        | 0.08        | 0.19         |
| CHO       | -0.63       | 6.91         | -0.70       | 15.38        |
| CHON      | 0.79        | 10.45        | 0.48        | 7.07         |
| CHOS      | -0.47       | 3.67         | 0.82        | 21.11        |
| CHONS     | 0.24        | 1.03         | 0.95        | 28.37        |

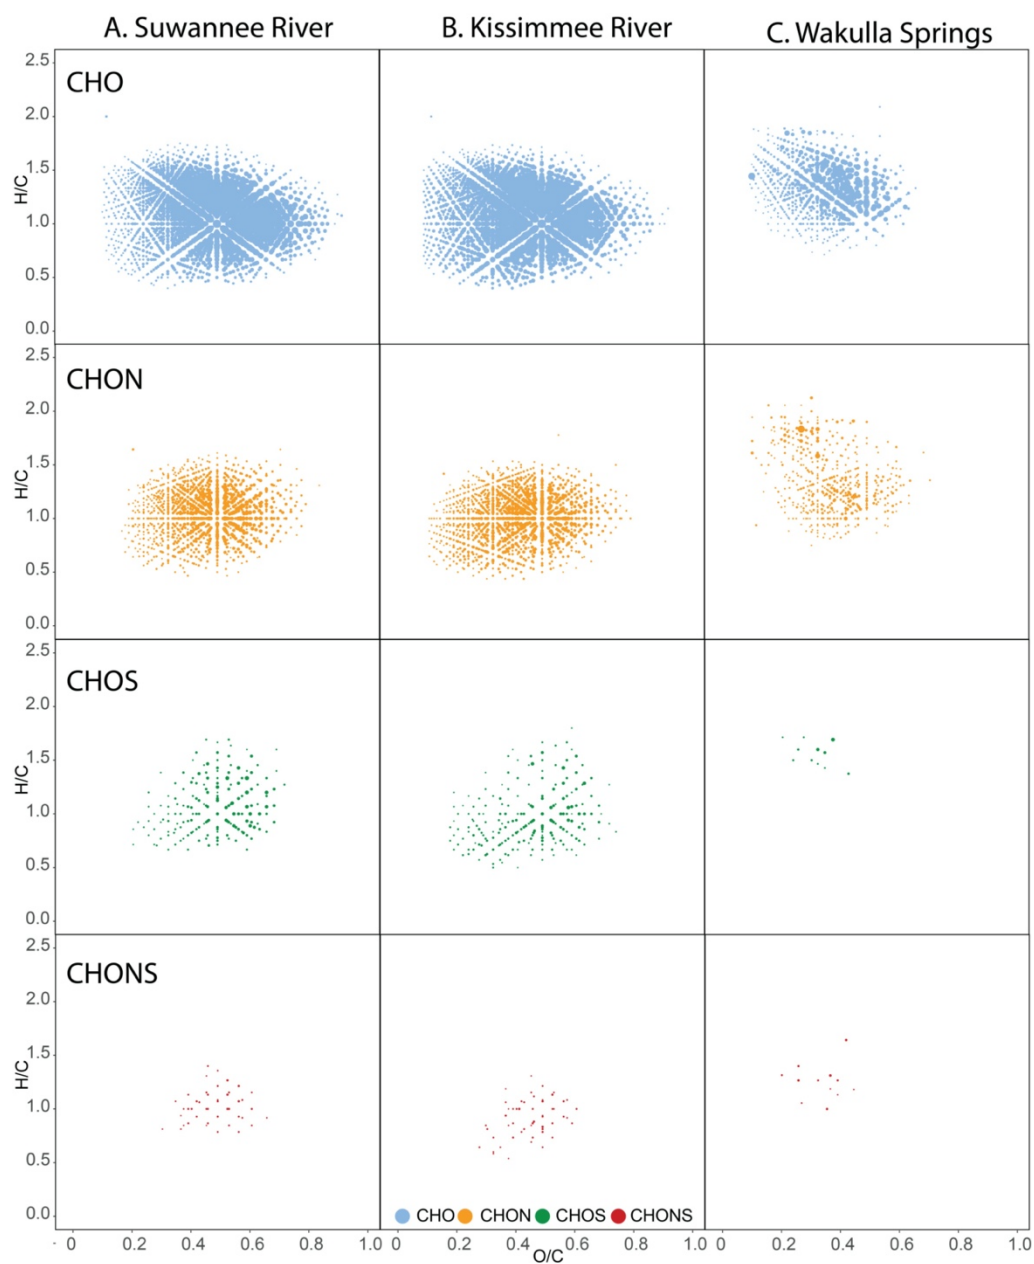

**Figure S1.** van Krevelen diagrams of the Suwannee River, Kissimmee River, and Wakulla Springs common DOM formulae observed between in ESI negative, APPI positive with THF doping, and APPI positive with toluene doping. Molecular formulae are colored by heteroatom composition (blue = CHO, top row; orange = CHON, 2<sup>nd</sup> row; green = CHOS, 3<sup>rd</sup> row; red = CHONS, bottom row) with the sizes scaled to relative abundances.

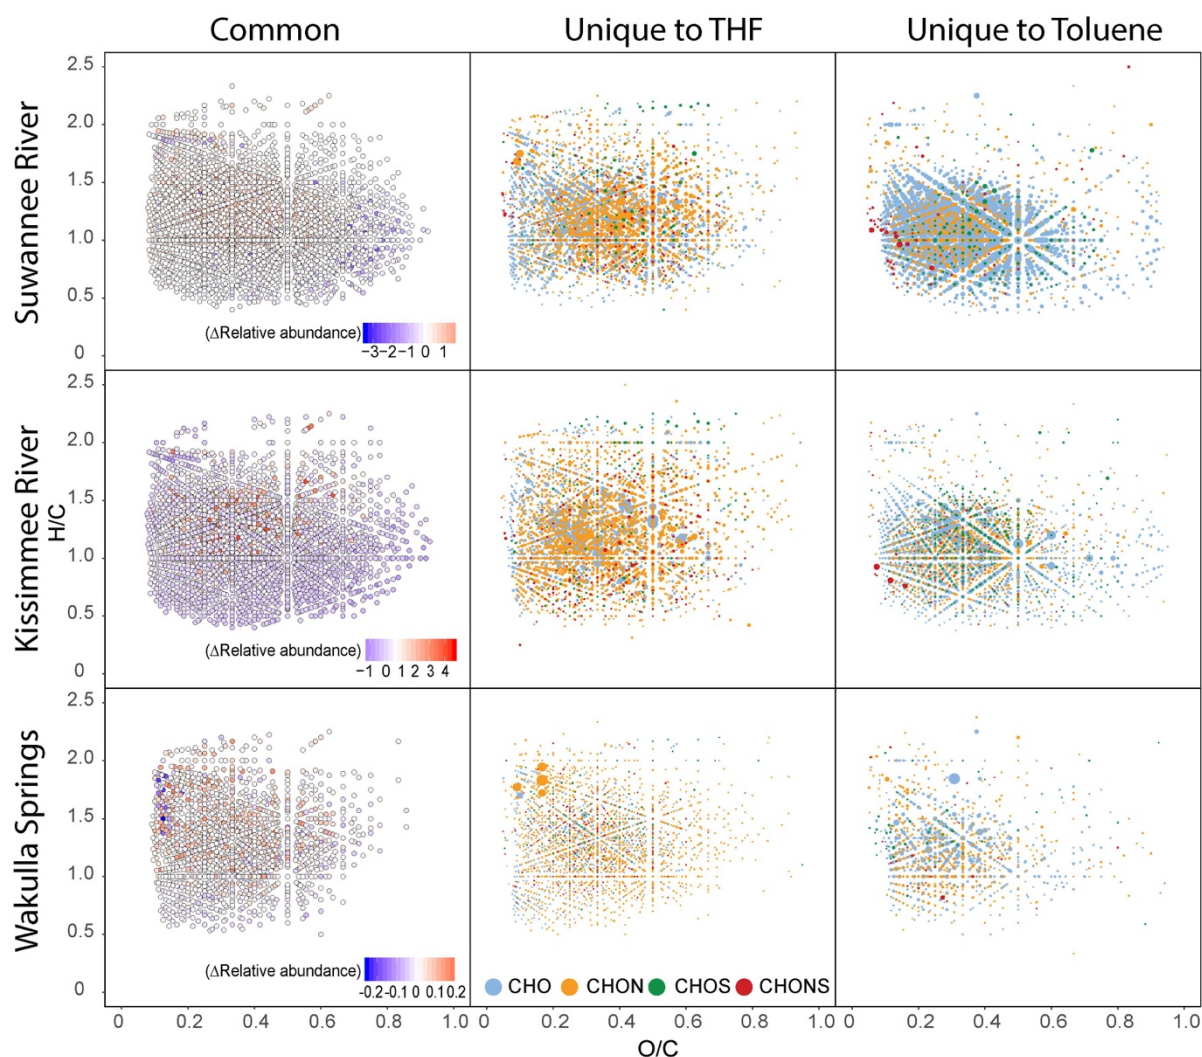

**Figure S2.** van Krevelen diagrams of assigned formulae by THF-doped and toluene-doped APPI measurements of the Suwannee River DOM, (top row), Kissimmee River DOM (middle row), and Wakulla Springs DOM (bottom row). Common formulae between THF- and toluene-doped measurements are colored by their change in relative abundance (90% quantile) where positive values (red) indicate greater relative abundance in THF-doped APPI and negative values (blue) indicate greater relative abundance in toluene-doped APPI. Formulae unique to both THF and toluene are colored by their molecular class (blue = CHO, orange = CHON, green = CHOS, red = CHONS) with their sizes scaled to relative abundances.

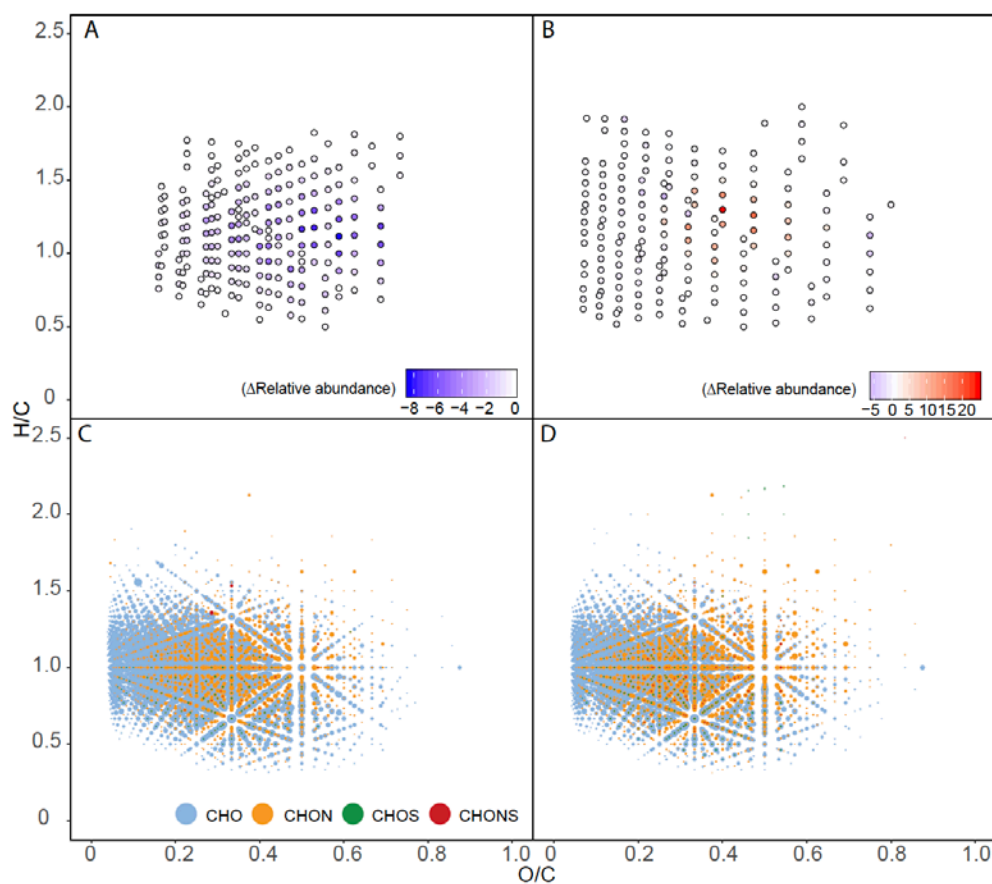

**Figure S3.** van Krevelen diagrams of assigned formulae in the isolated mass range of 392-408 Da from IRMPD experiments in both the Suwannee and Kissimmee River DOM samples. Common formulae observed in both DOM samples are colored by their change in relative abundance where positive values (red) are more abundant in Suwannee and negative values (blue) are more abundant in Kissimmee for (A) CHON-containing and (B) CHO-containing formulae. Fragments from 141-391 Da in the (C) Suwannee and (D) Kissimmee River are colored by their molecular classes (blue = CHO, orange = CHON, green = CHOS, red = CHONS) with their sizes scaled to relative abundances.

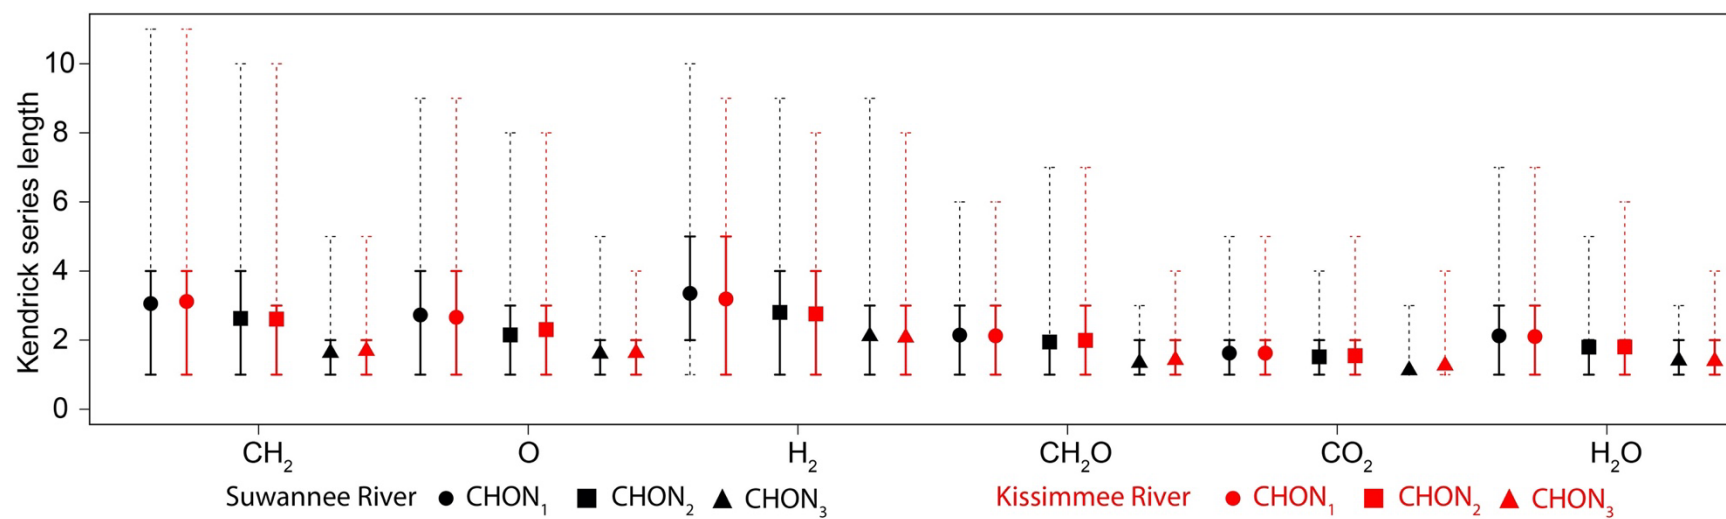

**Figure S4.** Boxplots of CH<sub>2</sub>, O, H<sub>2</sub>, CH<sub>2</sub>O, CO<sub>2</sub>, and H<sub>2</sub>O-based Kendrick series lengths of CHON formulae from the Suwannee (black) and Kissimmee (red) River. N-containing classes are subdivided by CHON<sub>1</sub> (circles), CHON<sub>2</sub> (squares), and CHON<sub>3</sub> (triangles).

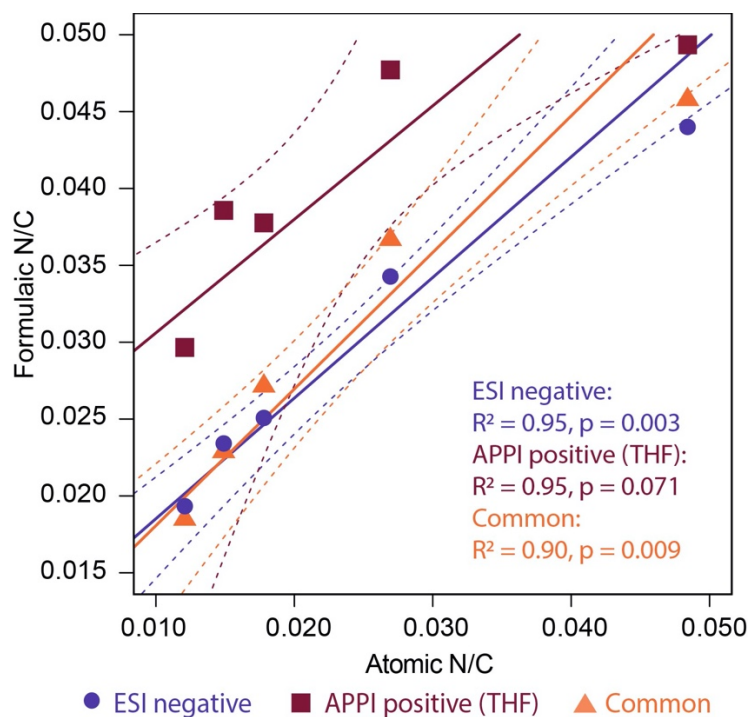

**Figure S5.** Relationship between the measured atomic N/C of the DOM isolates and the number-averaged formulaic N/C from the FT-ICR mass spectra measured by ESI negative (blue circles), THF-doped APPI positive (magenta squares), and formulae common to both ionization modes (orange triangles). Linear regressions (colored solid lines) and 95% confidence intervals (colored dashed lines) from each ionization were modeled with all DOM isolates.
